# Supplementary material for: Targeting exogenous genes to tumor angiogenesis by transplantation of genetically modified hematopoietic stem cells
Source: Springer Nature journal article supplement (doi:10.1038/nm871), 2003-05-12
Supplement: nm871-S2.pdf [file nm871-S2.pdf]

**Supplementary Figure 2.** Expression of the Tie2p/e vector after direct injection into tumor allografts. **a**, Immunofluorescence staining of cryostatic sections from a subcutaneous mammary carcinoma (TS/A) excised one week after injection of  $5 \times 10^7$  HUVEC Transducing Units of PGKp (left) and Tie2p/e (right) GFP vectors. Double immunofluorescence staining was performed using antibodies for GFP (grayscale or green) and the CD31 endothelial cell-specific marker (red). The yellow staining in the merged picture indicates co-expression of GFP and CD31 in the same cell. Although the PGKp vector revealed widespread transduction of tumor cells by the injected LV, the Tie2p/e vector was only expressed by a scattered cell population at the tumor periphery (P), where CD31+ EC were abundant and arranged in a loose network. **b**, Identification of the GFP+ cells in the tumors injected with the Tie2p/e vector. Double immunofluorescence staining shows CD31+ EC (top panel, arrowheads) and CD45+ hematopoietic cells (bottom panel). Representative fields containing GFP+ cells from one of twelve Tie2p/e- or three PGKp-injected mice examined. Scale bar: 120 $\mu$ m.
